# Supplementary material
Source: PubMed Central journal article supplement (PMC9831242)
Supplement: Supp_Data.pdf [file Supp_Data.pdf]

# Residency Transgender Education

---

Start of Block: Default Question Block

Q1 Does your residency program offer any formal didactic education regarding the medical care of transgender patients?

Yes

No

---

*Display This Question:*

*If Does your residency program offer any formal didactic education regarding the medical care of tr...  
= Yes*

Q1a How many times per academic year?

1

2

3

4

5

6

7

8

9

10

>10

---

Q2 Have you had any personal experience caring for transgender patients in your obstetrics and gynecology residency training?

Yes

No

---

*Display This Question:*

*If Have you had any personal experience caring for transgender patients in your obstetrics and gynec... = Yes*

Q2a If so, during which rotation? (select all that apply)

- General Obstetrics
  - General Gynecology
  - Maternal Fetal Medicine
  - Urogynecology/ Female Pelvic Medicine and Reconstructive Surgery
  - Reproductive Endocrinology and Infertility
  - Gynecologic Oncology
  - Pediatric and Adolescent Gynecology
  - Elective
  - Other (please specify):  

---
-

Q3 Do you feel knowledgeable about using appropriate gender terminology (cis-gender, transgender, non-binary/gender queer, and appropriate pronouns)?

- Not at all
  - Somewhat
  - Very much so
  - I'm not sure
- 

Q4 Do you feel that you work with at least one faculty member that has expertise in the field of transgender healthcare?

- Yes
  - No
  - I'm not sure
- 

Q5 Do you feel comfortable referring patients to transfriendly specialists in your healthcare system (urology, plastic surgery, behavioral health, etc.)?

- Not at all
  - Somewhat
  - Very much so
  - I'm not sure
-

Q6 Do you feel appropriately trained to meet the healthcare needs of a transgender patient?

- Not at all
  - Somewhat
  - Very much so
  - I'm not sure
- 

Q7 Do you feel appropriately trained to counsel transgender patients on contraception options?

- Not at all
  - Somewhat
  - Very much so
  - I'm not sure
- 

Q8 Do you feel appropriately trained to provide cancer-screening services to transgender patients?

- Not at all
  - Somewhat
  - Very much so
  - I'm not sure
-

Q9 Do you feel appropriately trained to prescribe gender-affirming hormone therapy to transgender patients?

- Not at all
  - Somewhat
  - Very much so
  - I'm not sure
- 

Q10 Have you had any surgical training in gender confirmation surgery?

- Yes
  - No
- 

*Display This Question:*

*If Have you had any surgical training in gender confirmation surgery? = Yes*

Q10a If so, approximately how much in your residency training to date?

- 1-5 cases
  - 6-10 cases
  - 11-15 cases
  - 16-20 cases
  - >20 cases
  - I'm not sure
-

Q11 Do you feel appropriately trained to counsel transgender patients regarding fertility preservation options?

- Not at all
  - Somewhat
  - Very much so
  - I'm not sure
- 

Q12 Do you feel that there are barriers in your residency program when it comes to educating residents on transgender health?

- Yes
  - No
  - I'm not sure
-

Q12a If you feel there are barriers to education regarding transgender medicine in your program, what are they? (select all that apply)

- Lack of formal curriculum
- Lack of time
- Lack of interest from faculty and/ or program director
- Lack of interest from residents
- Lack of transgender patient population
- Atmosphere of discrimination or bias towards gender minorities or LGBTQ population
- Other: (please specify)  

---
- I do not feel there are barriers

-----

Q13 Are you interested in further training in transgender medicine?

- Not at all interested
  - Neutral
  - Somewhat interested
  - Very interested
-

Q13a What areas are you interested in specifically? (select all that apply)

- Using culturally sensitive language
- Thorough medical/ sexual history taking
- Cancer screening
- Contraception
- Fertility preservation
- Gender-affirming hormone therapy
- Gender-affirming surgical techniques
- Other: (please specify)

- 
- I am not interested in further training in Transgender medicine

-----



Q14 What mode of learning do you think would be most beneficial to you for increasing your knowledge of transgender healthcare? (select all that apply)

Direct patient exposure

Increased didactic lectures/ readings

Standardized patient experiences

Online modules

I am not interested in learning more about transgender healthcare

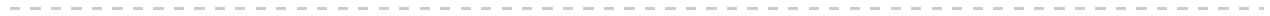

Q15 In which ACOG region is your residency program located?

- District I: Connecticut, Maine, Massachusetts, New Hampshire, Rhode Island, Vermont
  - District II: New York
  - District III: Delaware, New Jersey, Pennsylvania
  - District IV: District of Columbia, Georgia, Maryland, North Carolina, South Carolina, Virginia, West Virginia
  - District V: Indiana, Kentucky, Ohio, Michigan
  - District VI: Illinois, Iowa, Minnesota, Nebraska, North Dakota, South Dakota, Wisconsin
  - District VII: Alabama, Arkansas, Kansas, Louisiana, Mississippi, Missouri, Oklahoma, Tennessee
  - District VIII: Alaska, Arizona, Colorado, Hawaii, Idaho, Montana, Nevada, New Mexico, Oregon, Utah, Washington, Wyoming
  - District IX: California
  - District XI: Texas
  - District XII: Florida
-

Q16 Which gender do you identify with?

- Male (cis-male)
  - Female (cis-female)
  - Transmale
  - Transfemale
  - Non-binary
  - Prefer not to answer
- 

Q17 What year of residency training are you currently in?

- Year 1
- Year 2
- Year 3
- Year 4
- I graduated residency within the past year

End of Block: Default Question Block

---
